# Supplementary material
Source: Springer Nature journal article supplement (https://www.springermedizin.de/resource/supplementary/13102_2011_102_MOESM2_ESM.pdf/9667734)

# One Minus Survival Functions

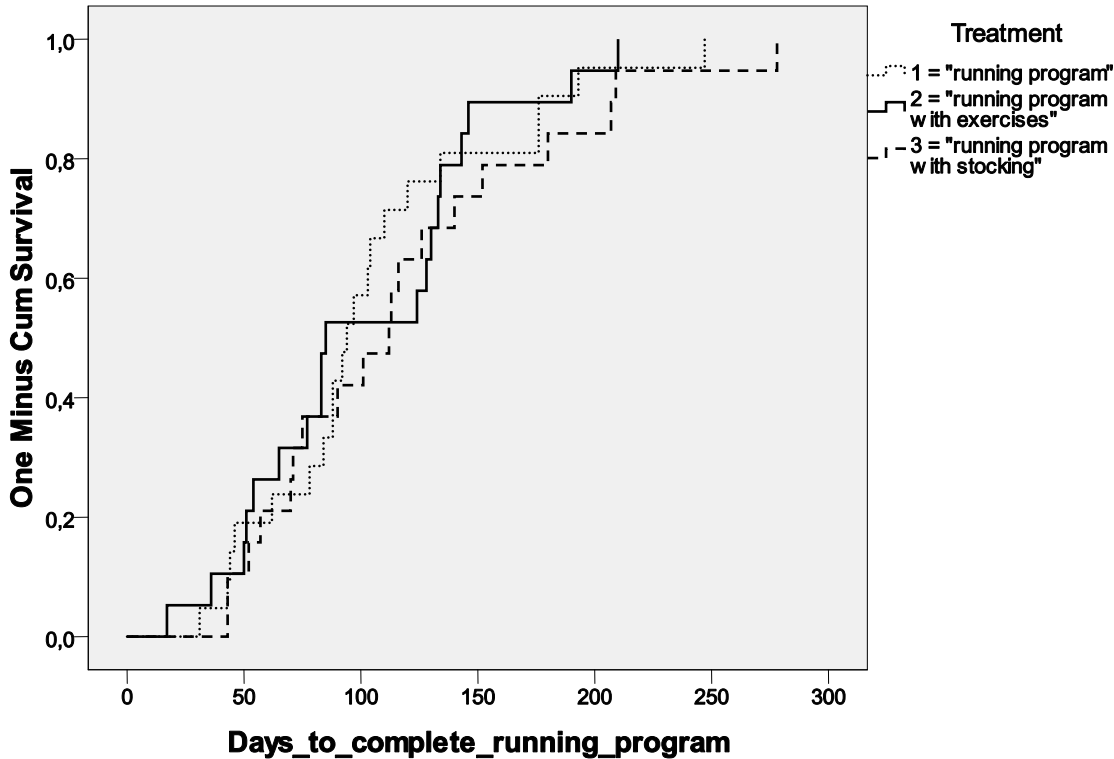

Supplement: MOESM2 [file 9667734]
